# Supplementary material
Source: PubMed Central journal article supplement (PMC3554403)

## **Supplementary Information**

### **Materials and Methods**

#### **Subjects**

Interviews were conducted with the volunteers to explain the protocol, determine whether they met the inclusion criteria, and record demographic data (age and gender). Exclusion criteria were treatment with antibiotics within 3 months prior to the beginning of the study or throughout its duration, being vegetarian, exercise of more than 2 h weekly, a history of a chronic gastrointestinal disorder, and the use of antihypertensive or lipid-lowering medications. Twenty-nine healthy adults were recruited to participate in this study. One female subject was excluded during the study as she required antibiotic treatment. Prior to the beginning of the study, training sessions were held to explain the protocol to the subjects.

Participants were instructed to incorporate the whole grains to their regular diet. Other instructions included withholding from strenuous physical activity and alcohol consumption on the day prior to blood drawing. Compliance with the dietary treatments was encouraged by meeting with the subjects on a weekly basis, on which occasions symptom diaries were collected and a bag with 7 daily portions of the treatment flakes were distributed.

#### **Test meals**

Prowashonupana (Sustagrain® Barley Quick Flakes, ConAgra Mills) is a waxy, hulless barley variety differing from standard barley in terms of its composition. Prowashonupana contains exceptionally high levels of total dietary fiber (30%), almost half being accounted for by  $\beta$ -glucan, and low levels of starch (<30%). Brown rice has high amounts of soluble starch (around 75%) and small amounts of total dietary fiber (around 7%). The processing of the barley flakes was as

follows, cleaned grain kernels were roller cut and steam treated at 100.5°C for 40 min to ensure microbiological safety and passed through flaking rolls to reduce the pieces to a thickness of  $0.020 \pm 0.002$  inches. The flakes were then cooled down to room temperature, seized, screened and packaged. The brown rice (Insta Grains® Brown Rice Flakes, Briess) was used as provided by the manufacturer. It is currently unknown how the processing conditions of both whole grains affect their functionality when compared to the unprocessed grains.

Digestible and resistant starches in the two flakes were measured in the products (K-RSTAR, Megazyme, Ireland), as well as  $\beta$ -glucans (K-BGLU, Megazyme, Ireland), and total dietary fiber (Andersson et al., 2009; AACC International, 2011). The nutritional data of the flakes is presented in Table S1.

#### **DNA extraction from fecal samples**

Fecal homogenates were transferred to bead beating tubes (Biospec products, USA) containing zirconium beads (300 mg). Homogenates were centrifuged ( $8,000\times g$  for 5 min at room temperature) and the bacterial cell pellets were washed twice by re-suspension in ice-cold PBS. 100  $\mu$ l of lysis buffer (200 mM NaCl, 100 mM Tris, 20 mM EDTA, 20 mg/ml Lysozyme, pH 8.0) containing 20 mg/ml of Lysozyme (Sigma-Aldrich) were added, and enzymatic lysis was conducted at 37°C for 30 min. 1.6 ml of buffer ASL from QIAamp DNA Stool Mini Kit (Qiagen, Germany) was added to each sample, after which the samples were mechanically homogenized in a MiniBeadbeater-8 (BioSpec Products, USA) for 2 min at maximum speed. DNA was purified from 1.2 ml of the resulting supernatant with the QIAamp DNA Stool Mini Kit following the manufacturer's instructions.

#### **Compositional analysis of the fecal microbiota by pyrosequencing**

Sequences were binned by primer barcodes using QIIME (Caporaso *et al.*, 2010). Sequences that were shorter than 300 bp or longer than 550 bp, contained one or more ambiguous nucleotides, had one or more mismatches to

the primer or barcode, had an average quality scores below 25, or contained homopolymer runs over 6 bp, were removed. Chimeras were removed using the Blast Fragments Algorithm included in QIIME.

OTU picking was performed by aligning sequences using the RDP Infernal Alignment tool and clustered with the Complete Linkage Clustering algorithm (RDP). As current OTU picking algorithms tend to generate too many clusters (Ghodsi *et al.*, 2011), abundance of OTUs identified to be associated with host phenotypes or dietary treatments were confirmed using BLASTn. For this purpose, 5 representative sequences per OTU were taxonomically assigned and aligned by ClustalW within their respective phylum. A distance matrix was generated and phylogenetic trees (one per phylum) were constructed using the Neighbor-joining algorithm (MEGA 4.0) (Tamura *et al.*, 2007). OTUs were assigned visually as clusters within the phylogenetic trees, and membership was confirmed by sequence comparisons and restricted to sequences with >97% similarity. Consensus sequences were generated for each OTU. To quantify each OTU, a local database was created in BioEdit (Hall, 1999) with all the sequences. BLASTn with >97% similarity and >95% length overlap was used to determine the number of sequences belonging to individual OTUs. OTUs that shared a majority of their sequences were merged.

### **Genome queries for $\beta$ -glucanase activity**

The web-based Integrated Microbial Genomes (IMG) database of the Joint Genome Institute (JGI) was used to identify gut organisms with beta-glucanase function. The following bacteria were included: *Bacteroides caccae* ATCC 43185, *Bacteroides coprocola* M16, *Bacteroides dorei* 5\_1\_36/D4, *Bacteroides dorei* DSM 17855, *Bacteroides eggerthii* 1\_2\_48FAA, *Bacteroides eggerthii* DSM 20697, *Bacteroides finegoldii* DSM 17565, *Bacteroides fragilis* 3\_1\_12, *Bacteroides fragilis* 638R, *Bacteroides fragilis* NCTC 9343, *Bacteroides fragilis* YCH46, *Bacteroides intestinalis* 341, *Bacteroides ovatus* 3\_8\_47FAA, *Bacteroides ovatus*

ATCC 8483, *Bacteroides ovatus* SD CC 2a, *Bacteroides ovatus* SD CMC 3f, *Bacteroides stercoris* ATCC 43183, *Bacteroides thetaiotaomicron* VPI-5482, *Bacteroides uniformis* ATCC 8492, *Bacteroides vulgatus* ATCC 8482; *Bacteroides vulgatus* PC510, *Bacteroides xylanisolvens* SD CC 1b, *Bacteroides xylanisolvens* XB1A, *Bifidobacterium adolescentis* ATCC 15703, *Bifidobacterium adolescentis* L2-32, *Bifidobacterium catenulatum* DSM 16992, *Bifidobacterium longum* DJO10A, *Bifidobacterium longum* NCC2705, *Bifidobacterium longum* subsp. *infantis* 157F-NC, *Bifidobacterium longum* subsp. *infantis* ATCC 16697, *Bifidobacterium longum* subsp. *infantis* JCM 1217, *Bifidobacterium longum* subsp. *longum* ATCC 55813, *Bifidobacterium longum* subsp. *longum* BBMN68, *Bifidobacterium longum* subsp. *longum* CCUG 52486, *Bifidobacterium longum* subsp. *longum* F8, *Bifidobacterium longum* subsp. *longum* JDM301, *Bifidobacterium longum* subsp. *longum* KACC 91563, *Bifidobacterium pseudocatenulatum* DSM 20438, *Blautia hansenii* VPI C7-24, *Blautia hydrogenotrophica* DSM 10507, *Bryantella formatexigens* I-52, *Butyrivibrio crossotus* DSM 2876, Clostridiales sp. SM4/1, Clostridiales sp. 1\_7\_47FAA, Clostridiales sp. SS3/4, Clostridiales sp. SSC/2, *Clostridium bolteae* ATCC BAA-613, *Clostridium butyricum* 5521, *Clostridium butyricum* E4, *Clostridium leptum* DSM 753, *Clostridium ramosum* VPI 0427, *Clostridium* sp. M62/1, *Clostridium spiroforme* DSM 15579, *Collinsella aerofaciens* ATCC 25986, *Collinsella intestinalis* DSM 13280, *Collinsella stercoris* DSM 13279, *Coprococcus comes* ATCC 27758, *Coprococcus eutactus* ATCC 27759, *Dialister invisus* DSM 15470, *Dorea formicigenerans* ATCC 27755, *Dorea longicatena* DSM 13814, *Eggerthella lenta* VPI 0255, *Enterococcus faecalis* ATCC 29200, *Enterococcus faecalis* ATCC 4200, *Eubacterium bifforme* DSM3989, *Eubacterium cylindroides* T2-87, *Eubacterium eligens* ATCC 27750, *Eubacterium hallii* DSM 3353, *Eubacterium limosum* KIST612, *Eubacterium rectale* ATCC 33656, *Eubacterium rectale* DSM 17629, *Eubacterium rectale* M104/1, *Eubacterium ventriosum* ATCC 27560, *Faecalibacterium prausnitzii* KLE1255, *Faecalibacterium prausnitzii* A2-165, *Faecalibacterium prausnitzii* L2-6, *Faecalibacterium prausnitzii* M21/2, *Faecalibacterium prausnitzii* SL3/3, Lachnospiraceae 1\_1\_57FAA,

Lachnospiraceae 1\_4\_56FAA, Lachnospiraceae 2\_1\_46FAA, Lachnospiraceae 2\_1\_58FAA, Lachnospiraceae 3\_1\_46FAA, Lachnospiraceae 3\_1\_57FAA, Lachnospiraceae 4\_1\_37FAA, Lachnospiraceae 5\_1\_37FAA, Lachnospiraceae 6\_1\_63FAA, Lachnospiraceae 9\_1\_43BFAA, Lachnospiraceae sp 5\_1\_63FAA, Lachnospiraceae 8\_1\_57FAA, *Olsenella uli* DSM 7084, *Odoribacter splanchnicus* DSM 20712, *Parabacteroides distasonis* ATCC 8503, *Parabacteroides merdae* ATCC 43184, *Parabacteroides* sp. D13, *Phascolarctobacterium* sp YIT 12067, *Prevotella bryantii* B14, *Roseburia intestinalis* L1-82, *Roseburia intestinalis* M50/1, *Roseburia intestinalis* XB6B4, *Roseburia inulinivorans* DSM 16841, *Ruminococcaceae bacterium* D16, *Ruminococcus bromii* L2-63, *Ruminococcus gnavus* ATCC 29149, *Ruminococcus lactaris* ATCC 29176, *Ruminococcus obeum* A2-162, *Ruminococcus obeum* ATCC 29174, *Ruminococcus torques* ATCC 27756, *Ruminococcus torques* L2-14, *Slackia exigua* ATCC 700122, *Slackia heliotrinireducens* DSM 20476, *Turicibacter sanguinis* PC909.

### **Short chain fatty acid determination**

SCFAs were determined based on approaches described by Campbell and coworkers (1997), with slight modifications. Undiluted fecal samples were removed from storage at -80°C and thawed on ice, and 0.4 g were diluted in 2.8 ml water containing 5-10 mM 4-methylvaleric acid and vortexed. 0.4 ml of 25% (w/v) metaphosphoric acid was added and the sample was vortexed again, followed by centrifugation for 20 min at 15,000 x g. The supernatant was stored overnight at -20°C. Samples were thawed and centrifuged in the same conditions as before. SCFA were quantified by gas chromatography (Perkin Elmer Clarus with Perkin Elmer Elite-FFAP column) in a 4 µl injection volume, and the data was analyzed with appropriate software (TotalChrom, Perkin Elmer, USA). Moisture quantification in the fecal samples was done as follows. Approximately 0.2 g of feces was introduced into a plastic tube with a small perforation in its cap and frozen overnight at -20°C. Samples were freeze dried for at least 36 hours

until stable weight of the sample was achieved, and dry weight was calculated. SCFA were expressed on a dry basis.

## Statistics

Correlations between host parameters and bacterial populations were assessed by Pearson's correlation test (GraphPad Prism v5.0). Graphs were generated for parameters that showed significant correlations and were visually inspected. If the removal of one single data-point caused the association to become non-significant, the data point was considered an outlier and removed.

Associations between inflammatory markers and members of the gut microbiome were further analyzed with the following linear models:

$$I_{ijt} = \beta_0 + \beta_1 \text{Fat} + \beta_2 \text{Gender} + \beta_3 \text{Age} + \beta_4 T2 + \beta_5 T3 + \beta_6 T4 \quad (1)$$

$$M_{hjt} = \beta_0 + \beta_1 \text{Fat} + \beta_2 \text{Gender} + \beta_3 \text{Age} + \beta_4 T2 + \beta_5 T3 + \beta_6 T4 \quad (2)$$

$I_{ijt}$  is the inflammatory marker  $i$  for subject  $j$  in treatment  $t$ ,  $i=1,2,3$ ;  $j=1\dots 28$ ;  $M_{hjt}$  is the inflammatory marker  $h$  for subject  $j$  in treatment  $t$ ,  $h=1,\dots,80$ ;  $j=1\dots 28$ ;  $t=1,2,3,4$ ; Fat indicates the percent body fat; Gender is a binary variable that takes values of 0 if the subject is female and 1 otherwise; Age is the age of subject in years; T2 is a binary variable that assigns 1 if the treatment is 30 grams of B and BR each and 0 otherwise; T3 is a binary variable that assigns 1 if the treatment is 60 grams of B and 0 otherwise; T4 is a binary variable that assigns 1 if the treatment is 60 grams of BR and 0 otherwise; and T1 represents no treatment and is left out of the models as the base. Fixed effects and random effects methods were used to estimate models (1) and (2). Chi-square estimates that measure the heterogeneity of the responses clustered by subject, were used as the criterion for choice between fixed and random effects estimation methods. For the models with Chi-square values associated with  $P < 0.1$ , random effects method was chosen.

Because hs-CRP concentrations >10 mg/l in plasma are indicative of acute inflammation unrelated to cardiovascular disease risk (Pearson et al., 2003). Therefore, 4 samples from 4 different subjects were excluded from the analysis. If the same samples also displayed abnormally high values of LBP or IL-6 levels, these data points were also considered outliers and removed. 2 and 3 samples were excluded from LBP and IL-6 analysis, respectively. One subject was excluded from the analysis of glucose parameters as incomplete data was obtained for this subject.

## References

AACC International. (2011). Methods 32-25.01, and 44-15.02. In *Approved Methods of Analysis*. 11<sup>th</sup> edition. St. Paul: AACC International.

Andersson AMA, Merker A, Nilsson P, Sorensen H, Aman P. (1999). Chemical composition of the potential new oilseed crops *Barbarea vulgaris*, *Barbarea verna* and *Lepidium campestre*. *J Sci Food and Agric* **79**:179-186.

Campbell JM, Fahey JC, Wolf BW. (1997). Selected Indigestible Oligosaccharides Affect Large Bowel Mass, Cecal and Fecal Short-Chain Fatty Acids, pH and Microflora in Rats. *J Nutr* **127**:130–136.

Caporaso JG, Kuczynski J, Stombaugh J, Bittinger K, Bushman FD, Costello EK *et al.* (2010). QIIME allows analysis of high-throughput community sequencing data. *Nat Methods* **7**:335-336.

Ghodsi M, Liu B, Pop M. (2011). DNACLUST: accurate and efficient clustering of phylogenetic marker genes. *BMC Bioinformatics*. **30**;12:271.

Tamura K, Dudley J, Nei M, Kumar S. (2007). MEGA4: Molecular Evolutionary Genetics Analysis (MEGA) software version 4.0. *Mol Biol Evol* **24**:1596-1599.

Hall TA. (1999). BioEdit: a user-friendly biological sequence alignment editor analysis program for Windows 95/98/NT. *Nucleic Acids Symposium Series* **41**:95-98.

Pearson TA, Mensah GA, Alexander RW, Anderson JL, Cannon RO III, Criqui M *et al.* (2003). Centers for Disease Control and Prevention; American Heart Association. Markers of inflammation and cardiovascular disease: application to clinical and public health practice: A statement for healthcare professionals from the Centers for Disease Control and Prevention and the American Heart Association. *Circulation* **107**:499-511.

**Table S1. Nutritional information of the barley and brown rice flakes used in the study.**

|                                      | Whole grain |            |
|--------------------------------------|-------------|------------|
|                                      | barley      | Brown rice |
| Calories (kcal per 100g)             | 392         | 366        |
| Fat (%)                              | 6.7         | 3.0        |
| Saturated fat (%)                    | 1.7         | 1.0        |
| Cholesterol (%)                      | 0.0         | 0.0        |
| Total carbohydrates (%)              | 64.6        | 80.0       |
| Digestible starch <sup>b</sup> (%)   | 32.3        | 83.3       |
| Resistant starch <sup>b</sup> (%)    | 0.2         | 0.5        |
| Total dietary fiber <sup>c</sup> (%) | 31.1        | 7.3        |
| Insoluble fiber <sup>c</sup> (%)     | 22.8        | 6.8        |
| Soluble fiber <sup>c</sup> (%)       | 8.3         | 0.5        |
| B-glucan <sup>d</sup> (%)            | 14.1        | 0.0        |
| Protein (%)                          | 18.2        | 8.0        |

<sup>a</sup> Nutrient composition as provided by the manufacturers except when specifically noted.

<sup>b</sup> Measured with K-RSTAR Megazyme kit. (Expressed as dry basis).

<sup>c</sup> Measured according to AACCI Approved Method 32-25.01 with modifications from Andersson et al. (1999). (Expressed as dry basis).

<sup>d</sup> Measured with K-BGLU Megazyme kit. (Expressed as dry basis).

**Table S2. List of bacterial species possessing  $\beta$ -glucanase genes and/or that responded to whole grain barley.** Bacterial genomes containing  $\beta$ -glucanase genes were identified using the Integrated Microbial Genomes system (IMG). The number and types of  $\beta$ -glucanases are indicated for the individual species. The number of subjects in which the species was detected and the direction of the shifts in response to WGB intake are presented. Abundances of species as a percentage of total fecal microbiota are also shown (mean  $\pm$  SD).



| Bacterial species                                 | Number and type of enzymes encoded                          | Number of subjects in which detected | Response to WGB in individual subjects | Abundance (% of total microbiota) |                |                          |                             | P-value (ANOVA) |
|---------------------------------------------------|-------------------------------------------------------------|--------------------------------------|----------------------------------------|-----------------------------------|----------------|--------------------------|-----------------------------|-----------------|
|                                                   |                                                             |                                      |                                        | Baseline (mean ± SD)              | BR (mean ± SD) | BR+WGB (mean ± SD)       | WGB (mean ± SD)             |                 |
| <i>Akkermansia muciniphila</i>                    | 2 β-glucanase precursor                                     | 10                                   | 10 no pattern                          | 0.84 ± 1.82                       | 0.57 ± 1.3     | 0.34 ± 0.86              | 0.41 ± 0.66                 | NS              |
| <i>Bacteroides caccae</i>                         | 7 β-glucanase/β-glucanase synthase                          | 17                                   | 17 no pattern                          | 0.2 ± 0.75                        | 0.09 ± 0.21    | 0.13 ± 0.31              | 0.13 ± 0.43                 | NS              |
| <i>Bacteroides coprocola</i>                      | 4 endoglucanase<br>2 β-glucanase/β-glucanase synthase       | 3                                    | 2 ↑<br>1 no pattern                    | 0.37 ± 1.52                       | 0.14 ± 0.5     | 1.06 ± 3.73              | 1.24 ± 4.68                 | NS              |
| <i>Bacteroides dorei</i>                          | 1 β-glucanase<br>2 β-glucanase/β-glucanase synthase         | 24                                   | 24 no pattern                          | 1.88 ± 3.81                       | 1.60 ± 2.90    | 1.37 ± 2.75              | 1.34 ± 2.84                 | NS              |
| <i>Bacteroides fingoldii</i>                      | 2 β-glucanase/β-glucanase synthase                          | 4                                    | 4 no pattern                           | 0.04 ± 0.2                        | 0.06 ± 0.19    | 0.06 ± 0.33              | 0.02 ± 0.08                 | NS              |
| <i>Bacteroides fragilis</i>                       | 9 β-glucanase precursor<br>3 putative β-glucanase precursor | 18                                   | 1 ↓<br>17 no pattern                   | 2.68 ± 8.12                       | 1.81 ± 6.04    | 1.60 ± 5.05              | 1.21 ± 4.56                 | NS              |
| <i>Bacteroides intestinalis</i>                   | 2 β-glucanase/β-glucanase synthase<br>6 endoglucanase       | 25                                   | 3 ↑<br>22 no pattern                   | 0.32 ± 0.55                       | 0.93 ± 2.66    | 0.38 ± 0.69              | 0.47 ± 0.76                 | NS              |
| <i>Bacteroides ovatus</i>                         | 2 β-glucanase/β-glucanase synthase<br>6 endoglucanase       | ND                                   |                                        |                                   |                |                          |                             |                 |
| <i>Bacteroides thetaiotamicron</i>                | 3 β-glucanase precursor<br>2 endoglucanase E precursor      | 25                                   | 25 no pattern                          | 0.57 ± 0.79                       | 0.72 ± 1.38    | 0.52 ± 0.98              | 0.40 ± 0.52                 | NS              |
| <i>Bacteroides uniformis</i>                      | 1 β-glucanase/β-glucanase synthase<br>8 endoglucanase       | 26                                   | 1 ↑<br>3 ↓<br>22 no pattern            | 4.55 ± 4.55                       | 3.34 ± 3.3     | 2.77 ± 3.38              | 3.57 ± 4.59                 | NS              |
| <i>Bacteroides eggerthii</i>                      | 2 endoglucanase                                             | 7                                    | 1 ↑<br>6 no pattern                    | 0.35 ± 1.39                       | 0.36 ± 1.03    | 0.32 ± 1.15              | 0.33 ± 0.97                 | NS              |
| <i>Blautia wexlerae</i>                           | No matches found                                            | 28                                   | 6 ↑<br>1 ↓<br>11 no pattern            | 1.07 ± 0.78                       | 1.58 ± 1.11    | 1.49 ± 0.98              | 1.82 ± 1.14 <sup>¶¶¶¶</sup> | < 0.0001        |
| <i>Blautia hydrogenotrophica</i>                  | No matches found                                            | 4                                    | 4 no pattern                           | 0.00 ± 0.01                       | 0.00 ± 0.01    | 0.00 ± 0.02              | 0.00 ± 0.01                 | NS              |
| <i>Blautia coccooides</i>                         | No matches found                                            | 7                                    | 7 no pattern                           | 0.01 ± 0.02                       | 0.00 ± 0.01    | 0.00 ± 0.01              | 0.01 ± 0.02                 | NS              |
| <i>Blautia producta</i>                           | No matches found                                            | 4                                    | 4 no pattern                           | 0.01 ± 0.03                       | 0.00 ± 0.01    | 0.00 ± 0.01              | 0.00 ± 0.01                 | NS              |
| <i>Blautia hansenii</i>                           | No matches found                                            | 5                                    | 5 no pattern                           | 0.10 ± 0.26                       | 0.05 ± 0.16    | 0.18 ± 0.91              | 0.08 ± 0.34                 | NS              |
| <i>Blautia</i> spp. ( <i>Ruminococcus obeum</i> ) | 1,3-beta-glucosidase                                        | 14                                   | 4 ↑<br>10 no pattern                   | 1.81 ± 1.13                       | 2.38 ± 1.69    | 2.75 ± 1.75 <sup>¶</sup> | 2.80 ± 2.04 <sup>¶¶</sup>   | 0.006           |

|                                          |                                                                      |    |                                |                 |                 |                              |                                  |          |
|------------------------------------------|----------------------------------------------------------------------|----|--------------------------------|-----------------|-----------------|------------------------------|----------------------------------|----------|
| <i>Bifidobacterium adolescentis</i>      | 2 putative $\beta$ -1,3-endoglucanase<br>2 endoglucanase             | 14 | 2 $\uparrow$<br>12 no pattern  | 0.22 $\pm$ 0.42 | 0.36 $\pm$ 0.83 | 0.64 $\pm$ 1.3               | 0.48 $\pm$ 1.08                  | NS       |
| <i>Bifidobacterium angulatum</i>         | 2 endoglucanase                                                      | ND |                                |                 |                 |                              |                                  |          |
| <i>Bifidobacterium longum</i>            | 1 putative $\beta$ -1,3-exoglucanase<br>2 endoglucanase              | 17 | 1 $\uparrow$<br>16 no pattern  | 0.16 $\pm$ 0.42 | 0.17 $\pm$ 0.50 | 0.18 $\pm$ 0.33              | 0.23 $\pm$ 0.50                  | NS       |
| <i>Bifidobacterium pseudocatenulatum</i> | 4 endoglucanase                                                      | 7  | 7 no pattern                   | 0.07 $\pm$ 0.22 | 0.14 $\pm$ 0.65 | 0.08 $\pm$ 0.24              | 0.07 $\pm$ 0.20                  | NS       |
| <i>Clostridium butyricum</i>             | 7 endoglucanase                                                      | 4  | 4 no pattern                   | 0.01 $\pm$ 0.03 | 0.00 $\pm$ 0.01 | 0.00 $\pm$ 0.01              | 0.00 $\pm$ 0.01                  | NS       |
| <i>Clostridium ramosum</i>               | 2 $\beta$ -glucanase/ $\beta$ -glucanase synthase<br>2 endoglucanase | ND |                                |                 |                 |                              |                                  |          |
| <i>Collinsella aerofaciens</i>           | 2 endoglucanase                                                      | 17 | 17 no pattern                  | 0.08 $\pm$ 0.22 | 0.14 $\pm$ 0.28 | 0.1 $\pm$ 0.19               | 0.08 $\pm$ 0.18                  | NS       |
| <i>Collinsella intestinalis</i>          | 2 endoglucanase                                                      | ND |                                |                 |                 |                              |                                  |          |
| <i>Collinsella stercoris</i>             | 2 endoglucanase                                                      | ND |                                |                 |                 |                              |                                  |          |
| <i>Coprococcus comes</i>                 | 2 endoglucanase                                                      | 25 | 1 $\uparrow$<br>24 no pattern  | 0.29 $\pm$ 0.38 | 0.35 $\pm$ 0.42 | 0.33 $\pm$ 0.48              | 0.29 $\pm$ 0.45                  | NS       |
| <i>Coprococcus eutactus</i>              | 1 $\beta$ -glucanase/ $\beta$ -glucanase synthase<br>8 endoglucanase | 13 | 1 $\uparrow$<br>12 no pattern  | 0.68 $\pm$ 1.23 | 0.64 $\pm$ 1.23 | 0.62 $\pm$ 1.29              | 0.75 $\pm$ 1.35                  | NS       |
| <i>Dialister invisus</i>                 | No matches found                                                     |    |                                | 0.52 $\pm$ 0.97 | 0.41 $\pm$ 0.72 | 0.56 $\pm$ 0.86              | 0.81 $\pm$ 1.41                  |          |
| <i>Eubacterium eligens</i>               | 1 putative endoglucanase                                             | 14 | 2 $\uparrow$<br>12 no pattern  | 0.22 $\pm$ 0.42 | 0.36 $\pm$ 0.83 | 0.64 $\pm$ 1.3               | 0.48 $\pm$ 1.08                  | NS       |
| <i>Eubacterium rectale</i>               | 1 endo-1,4- $\beta$ -glucanase                                       | 28 | 14 $\uparrow$<br>14 no pattern | 2.48 $\pm$ 2.67 | 2.75 $\pm$ 3.27 | 3.65 $\pm$ 3.45              | 4.83 $\pm$ 3.98 <sup>††††</sup>  | 0.001    |
| <i>Roseburia inulinivorans</i>           | 1 endo-1,4- $\beta$ -glucanase                                       | 28 | 1 $\uparrow$<br>27 no pattern  | 0.25 $\pm$ 0.3  | 0.21 $\pm$ 0.32 | 0.14 $\pm$ 0.24              | 0.16 $\pm$ 0.18                  | NS       |
| <i>Roseburia faecis</i>                  | Not in database                                                      | 27 | 10 $\uparrow$<br>17 no pattern | 0.12 $\pm$ 0.17 | 0.06 $\pm$ 0.07 | 0.26 $\pm$ 0.31              | 0.53 $\pm$ 0.92 <sup>†††††</sup> | < 0.0001 |
| <i>Roseburia intestinalis</i>            | 5 endo-1,4- $\beta$ -glucanase                                       | 28 | 9 $\uparrow$<br>19 no pattern  | 0.09 $\pm$ 0.12 | 0.04 $\pm$ 0.05 | 0.17 $\pm$ 0.18 <sup>†</sup> | 0.30 $\pm$ 0.42 <sup>††††</sup>  | < 0.0001 |

ND: Not detected; NS: Not significant.

**Table S3. Treatment effect on metabolic and immunological markers for all subjects.** Metabolic data of the 28 participants, at baseline and at the end of the 4-week dietary treatments (BR, BR+WGB, WGB). Values are presented as mean  $\pm$  SD.

|                                    | Overall           |                   |                   |                   | <i>P-value</i> |
|------------------------------------|-------------------|-------------------|-------------------|-------------------|----------------|
|                                    | Baseline          | BR                | BR+WGB            | WGB               |                |
| Cholesterol                        |                   |                   |                   |                   |                |
| Total cholesterol (mmol/l)         | 4.86 $\pm$ 1.15   | 4.76 $\pm$ 0.79   | 4.56 $\pm$ 0.89   | 4.89 $\pm$ 0.94   | NS             |
| Non-HDL (mmol/l)                   | 3.09 $\pm$ 1.04   | 3.15 $\pm$ 0.84   | 3.00 $\pm$ 0.85   | 3.32 $\pm$ 0.94   | NS             |
| HDL (mmol/l)                       | 1.63 $\pm$ 0.43   | 1.60 $\pm$ 0.37   | 1.55 $\pm$ 0.45   | 1.57 $\pm$ 0.36   | NS             |
| Plasma glucose                     |                   |                   |                   |                   |                |
| Fasting (mmol/l)                   | 5.15 $\pm$ 0.73   | 4.87 $\pm$ 0.49   | 4.81 $\pm$ 0.39   | 4.81 $\pm$ 0.50   | NS             |
| AUC ([mmol/l] <sup>2</sup> )       | 784 $\pm$ 184     | 763 $\pm$ 164     | 746 $\pm$ 132     | 770 $\pm$ 179     | NS             |
| Max. peak (mmol/l)                 | 9.08 $\pm$ 2.78   | 8.58 $\pm$ 2.02   | 7.92 $\pm$ 1.46   | 8.19 $\pm$ 2.35   | < 0.1          |
| Plasma insulin                     |                   |                   |                   |                   |                |
| Fasting ( $\mu$ UI/ml)             | 6.77 $\pm$ 1.96   | 6.60 $\pm$ 2.13   | 6.51 $\pm$ 2.02   | 7.03 $\pm$ 2.07   | NS             |
| AUC ([ $\mu$ UI/ml] <sup>2</sup> ) | 3463 $\pm$ 1523   | 3606 $\pm$ 1520   | 3333 $\pm$ 1035   | 3540 $\pm$ 1481   | NS             |
| Max. peak ( $\mu$ UI/ml)           | 44.08 $\pm$ 19.19 | 44.70 $\pm$ 19.56 | 42.86 $\pm$ 14.49 | 45.13 $\pm$ 21.61 | NS             |
| Inflammatory markers               |                   |                   |                   |                   |                |
| IL-6 (pg/ml)                       | 1.68 $\pm$ 1.36   | 1.21 $\pm$ 0.99   | 0.90 $\pm$ 0.45*  | 1.12 $\pm$ 0.63   | 0.0295         |
| Hs-CRP (mg/L)                      | 1.60 $\pm$ 2.23   | 1.33 $\pm$ 1.65   | 0.95 $\pm$ 1.23   | 1.36 $\pm$ 1.88   | NS             |
| LBP ( $\mu$ g/ml)                  | 14.41 $\pm$ 19.65 | 14.39 $\pm$ 2.09  | 13.23 $\pm$ 19.04 | 13.78 $\pm$ 18.30 | NS             |

\**P* < 0.05 compared to Baseline.

**Table S4. Treatment effect on metabolic and immunological markers in the subjects according to gender.** Metabolic data of the female and male volunteers, at baseline and at the end of the 4-week dietary treatments (BR, BR+WGB, WGB). Values are presented as mean  $\pm$  SD.

|                                    | Males             |                   |                   |                   |                | Females           |                   |                   |                   |                |
|------------------------------------|-------------------|-------------------|-------------------|-------------------|----------------|-------------------|-------------------|-------------------|-------------------|----------------|
|                                    | Baseline          | BR                | BR+WGB            | WGB               | <i>P-value</i> | Baseline          | BR                | BR+WGB            | WGB               | <i>P-value</i> |
| <b>Cholesterol</b>                 |                   |                   |                   |                   |                |                   |                   |                   |                   |                |
| Total cholesterol (mmol/l)         | 4.42 $\pm$ 1.11   | 4.59 $\pm$ 0.85   | 4.31 $\pm$ 0.91   | 4.46 $\pm$ 0.89   | NS             | 5.02 $\pm$ 1.14   | 4.87 $\pm$ 0.76   | 4.73 $\pm$ 0.87   | 5.15 $\pm$ 0.89   | 0.0342         |
| Non-HDL (mmol/l)                   | 2.78 $\pm$ 0.74   | 3.01 $\pm$ 0.96*  | 2.90 $\pm$ 0.93   | 3.08 $\pm$ 0.82   | 0.0327         | 3.29 $\pm$ 1.16   | 3.24 $\pm$ 0.78   | 3.06 $\pm$ 0.83   | 3.47 $\pm$ 1.00   | NS             |
| HDL (mmol/l)                       | 1.30 $\pm$ 0.28   | 1.41 $\pm$ 0.30   | 1.33 $\pm$ 0.31   | 1.23 $\pm$ 0.24   | NS             | 1.84 $\pm$ 0.37   | 1.73 $\pm$ 0.36   | 1.69 $\pm$ 0.48   | 1.76 $\pm$ 0.25   | NS             |
| <b>Plasma glucose</b>              |                   |                   |                   |                   |                |                   |                   |                   |                   |                |
| Fasting (mmol/l)                   | 5.14 $\pm$ 0.72   | 5.10 $\pm$ 0.64   | 4.91 $\pm$ 0.39   | 4.86 $\pm$ 0.34   | NS             | 5.15 $\pm$ 0.76   | 4.72 $\pm$ 0.29   | 4.75 $\pm$ 0.40   | 4.77 $\pm$ 0.59   | 0.0344         |
| AUC ([mmol/l] <sup>2</sup> )       | 860 $\pm$ 232     | 851 $\pm$ 143     | 762 $\pm$ 166     | 857 $\pm$ 180     | NS             | 739 $\pm$ 138     | 706 $\pm$ 155     | 735 $\pm$ 110     | 718 $\pm$ 162     | NS             |
| Max. peak (mmol/l)                 | 10.13 $\pm$ 3.25  | 10.08 $\pm$ 1.67  | 8.21 $\pm$ 1.80   | 8.99 $\pm$ 2.37   | < 0.1          | 8.40 $\pm$ 2.27   | 7.61 $\pm$ 1.61   | 7.74 $\pm$ 1.23   | 7.66 $\pm$ 2.26   | NS             |
| <b>Plasma insulin</b>              |                   |                   |                   |                   |                |                   |                   |                   |                   |                |
| Fasting ( $\mu$ UI/ml)             | 6.63 $\pm$ 1.75   | 5.93 $\pm$ 1.90   | 6.38 $\pm$ 1.80   | 6.05 $\pm$ 2.12   | NS             | 6.85 $\pm$ 2.12   | 7.04 $\pm$ 2.22   | 6.60 $\pm$ 2.20   | 7.66 $\pm$ 1.83   | NS             |
| AUC ([ $\mu$ UI/ml] <sup>2</sup> ) | 3436 $\pm$ 1787   | 3816 $\pm$ 1704   | 3399 $\pm$ 1086   | 3600 $\pm$ 1586   | NS             | 3480 $\pm$ 1405   | 3483 $\pm$ 1442   | 3294 $\pm$ 1037   | 3505 $\pm$ 1465   | NS             |
| Max. peak ( $\mu$ UI/ml)           | 42.76 $\pm$ 20.55 | 48.63 $\pm$ 19.14 | 41.46 $\pm$ 12.37 | 48.54 $\pm$ 22.37 | NS             | 44.93 $\pm$ 18.86 | 42.15 $\pm$ 19.98 | 43.76 $\pm$ 16.01 | 42.92 $\pm$ 21.50 | NS             |
| <b>Inflammatory markers</b>        |                   |                   |                   |                   |                |                   |                   |                   |                   |                |
| IL-6 (pg/ml)                       | 1.18 $\pm$ 0.81   | 1.42 $\pm$ 1.35   | 1.99 $\pm$ 3.63   | 1.09 $\pm$ 0.58   | NS             | 2.01 $\pm$ 1.58   | 1.16 $\pm$ 0.83*  | 1.10 $\pm$ 0.86** | 1.67 $\pm$ 2.39*  | 0.0028         |
| Hs-CRP (mg/L)                      | 0.35 $\pm$ 0.22   | 0.92 $\pm$ 1.26   | 0.31 $\pm$ 0.24   | 0.76 $\pm$ 1.07   | NS             | 2.35 $\pm$ 2.56   | 1.57 $\pm$ 1.85   | 1.33 $\pm$ 1.43   | 1.72 $\pm$ 2.19   | NS             |
| LBP ( $\mu$ g/ml)                  | 4.76 $\pm$ 2.96   | 6.50 $\pm$ 5.48   | 4.42 $\pm$ 2.22   | 6.19 $\pm$ 4.09   | NS             | 20.44 $\pm$ 23.19 | 19.32 $\pm$ 25.62 | 18.73 $\pm$ 22.74 | 18.52 $\pm$ 22.04 | NS             |

\**P* < 0.05 compared to Baseline.

\*\**P* < 0.01 compared to Baseline.

**Table S5. Treatment effect on metabolic and immunological markers in normoweight and overweight subjects.**

Metabolic data of normoweight and overweight, at baseline and at the end of the 4-week dietary treatments (BR, BR+WGB, WGB). Values are presented as mean  $\pm$  SD.

|                                    | Overweight        |                   |                   |                   |                | Normoweight       |                   |                   |                   |                |
|------------------------------------|-------------------|-------------------|-------------------|-------------------|----------------|-------------------|-------------------|-------------------|-------------------|----------------|
|                                    | Baseline          | BR                | BR+WGB            | WGB               | <i>P-value</i> | Baseline          | BR                | BR+WGB            | WGB               | <i>P-value</i> |
| <b>Cholesterol</b>                 |                   |                   |                   |                   |                |                   |                   |                   |                   |                |
| Total cholesterol (mmol/l)         | 4.84 $\pm$ 1.26   | 4.84 $\pm$ 0.86   | 4.51 $\pm$ 0.89   | 5.03 $\pm$ 1.05   | NS             | 4.75 $\pm$ 1.07   | 4.69 $\pm$ 0.75   | 4.61 $\pm$ 0.92   | 4.77 $\pm$ 0.84   | NS             |
| Non-HDL (mmol/l)                   | 3.24 $\pm$ 1.21   | 3.35 $\pm$ 0.97   | 3.12 $\pm$ 0.90   | 3.52 $\pm$ 1.05   | NS             | 2.94 $\pm$ 0.85   | 2.98 $\pm$ 0.71   | 2.89 $\pm$ 0.83   | 3.14 $\pm$ 0.83   | NS             |
| HDL (mmol/l)                       | 1.61 $\pm$ 0.45   | 1.47 $\pm$ 0.32   | 1.37 $\pm$ 0.40   | 1.51 $\pm$ 0.35   | NS             | 1.65 $\pm$ 0.42   | 1.72 $\pm$ 0.38   | 1.71 $\pm$ 0.45   | 1.62 $\pm$ 0.37   | NS             |
| <b>Plasma glucose</b>              |                   |                   |                   |                   |                |                   |                   |                   |                   |                |
| Fasting (mmol/l)                   | 5.37 $\pm$ 0.93   | 4.87 $\pm$ 0.45*  | 4.88 $\pm$ 0.37   | 4.88 $\pm$ 0.42   | 0.0231         | 4.94 $\pm$ 0.40   | 4.87 $\pm$ 0.54   | 4.75 $\pm$ 0.42   | 4.74 $\pm$ 0.57   | NS             |
| AUC ([mmol/l] <sup>2</sup> )       | 867 $\pm$ 184     | 800 $\pm$ 187     | 774 $\pm$ 128     | 811 $\pm$ 160     | NS             | 707 $\pm$ 153     | 730 $\pm$ 140     | 720 $\pm$ 135     | 731 $\pm$ 192     | NS             |
| Max. peak (mmol/l)                 | 9.66 $\pm$ 2.14   | 8.53 $\pm$ 2.11   | 7.99 $\pm$ 1.32*  | 8.43 $\pm$ 1.79   | 0.0428         | 8.58 $\pm$ 3.09   | 7.86 $\pm$ 1.62   | 7.98 $\pm$ 2.80   | 8.63 $\pm$ 2.01   | NS             |
| <b>Plasma insulin</b>              |                   |                   |                   |                   |                |                   |                   |                   |                   |                |
| Fasting ( $\mu$ UI/ml)             | 6.93 $\pm$ 1.70   | 7.10 $\pm$ 2.53   | 6.82 $\pm$ 1.78   | 7.60 $\pm$ 1.58   | NS             | 6.62 $\pm$ 2.22   | 6.17 $\pm$ 1.69   | 6.24 $\pm$ 2.24   | 6.54 $\pm$ 2.36   | NS             |
| AUC ([ $\mu$ UI/ml] <sup>2</sup> ) | 3730 $\pm$ 1677   | 3952 $\pm$ 1665   | 3249 $\pm$ 1128   | 3804 $\pm$ 1482   | NS             | 3216 $\pm$ 1382   | 3284 $\pm$ 1354   | 3411 $\pm$ 978    | 3295 $\pm$ 1493   | NS             |
| Max. peak ( $\mu$ UI/ml)           | 48.39 $\pm$ 19.92 | 50.23 $\pm$ 22.63 | 43.19 $\pm$ 16.16 | 49.94 $\pm$ 21.17 | NS             | 40.34 $\pm$ 18.38 | 39.90 $\pm$ 15.67 | 42.57 $\pm$ 13.45 | 40.96 $\pm$ 26.83 | NS             |
| <b>Inflammatory markers</b>        |                   |                   |                   |                   |                |                   |                   |                   |                   |                |
| IL-6 (pg/ml)                       | 2.03 $\pm$ 1.32   | 1.64 $\pm$ 1.27   | 0.97 $\pm$ 0.52*  | 1.40 $\pm$ 0.77   | 0.0438         | 1.35 $\pm$ 1.36   | 0.81 $\pm$ 0.32   | 0.83 $\pm$ 0.38   | 0.86 $\pm$ 0.32   | NS             |
| Hs-CRP (mg/L)                      | 2.26 $\pm$ 2.47   | 2.12 $\pm$ 1.96   | 1.37 $\pm$ 1.52   | 1.86 $\pm$ 1.87   | NS             | 1.04 $\pm$ 1.93   | 0.66 $\pm$ 0.99   | 0.59 $\pm$ 0.83   | 0.94 $\pm$ 1.86   | NS             |
| LBP ( $\mu$ g/ml)                  | 22.45 $\pm$ 24.90 | 23.56 $\pm$ 26.42 | 21.63 $\pm$ 23.90 | 22.16 $\pm$ 22.66 | NS             | 6.36 $\pm$ 6.67   | 4.83 $\pm$ 5.58   | 5.40 $\pm$ 5.63   | 5.21 $\pm$ 6.83   | NS             |

\**P* < 0.05 compared to Baseline.

**Table S6. Gastrointestinal symptoms.** Weekly gastrointestinal symptoms of the 28 participating subjects, scored in a scale from 1 (best/normal) to 5 (worst/abnormal) during the baseline and at the end of each 4-week dietary treatment (BR, BR+WGB, WGB). Values are presented as mean  $\pm$  SD.

|                    | Baseline      | BR            | BR+WGB                          | WGB                              | <i>P</i> -value |
|--------------------|---------------|---------------|---------------------------------|----------------------------------|-----------------|
| Bowel movement     | 1.5 $\pm$ 0.5 | 1.3 $\pm$ 0.5 | 1.7 $\pm$ 0.6                   | 2.0 $\pm$ 0.8 <sup>¶¶</sup>      | < 0.01          |
| Stool consistency  | 1.5 $\pm$ 0.6 | 1.4 $\pm$ 0.5 | 1.8 $\pm$ 0.6                   | 2.0 $\pm$ 0.8 <sup>¶¶</sup>      | < 0.01          |
| General well-being | 1.2 $\pm$ 0.3 | 1.2 $\pm$ 0.4 | 1.5 $\pm$ 0.6                   | 2.2 $\pm$ 0.6 <sup>¶¶¶¶¶¶*</sup> | < 0.001         |
| Flatulence         | 1.3 $\pm$ 0.5 | 1.4 $\pm$ 0.5 | 2.2 $\pm$ 0.9 <sup>¶¶¶¶¶¶</sup> | 3.1 $\pm$ 1.0 <sup>¶¶¶¶¶¶*</sup> | < 0.001         |
| Abdominal pain     | 1.1 $\pm$ 0.2 | 1.1 $\pm$ 0.3 | 1.4 $\pm$ 0.6                   | 1.8 $\pm$ 0.8 <sup>¶¶¶¶¶¶*</sup> | < 0.001         |
| Bloating           | 1.2 $\pm$ 0.4 | 1.2 $\pm$ 0.4 | 1.6 $\pm$ 0.7 <sup>¶¶</sup>     | 2.2 $\pm$ 0.8 <sup>¶¶¶¶¶¶*</sup> | < 0.001         |

¶¶ Compared to baseline

¶ Compared to BR

## Supplementary Figures

**Figure S1. Association between inflammatory and metabolic markers and bacterial taxa in fecal samples.** A heat map shows correlation coefficients (Pearson) between BMI, percent body fat, IL-6, hs-CRP, LBP and glucose AUC with proportions of bacterial taxa in fecal samples.

**Figure S2. Associations between Bacteroidetes related taxa and HDL plasma levels at baseline.** Correlations between proportions of Bacteroidetes (A), Bacteroidaceae (B) and Bacteroides (C) in fecal samples with HDL measured in plasma at baseline. Pearson's  $r$  correlation and the  $P$  values are presented.

**Figure S3. Impact of whole grains on the fecal microbiota.** Diversity of the bacterial population in fecal samples assessed by Shannon's (A) and Simpson's (B)  $\alpha$ -diversity indices. \*  $P < 0.05$ , \*\*  $P < 0.01$ .

**Figure S4. Association between diet induced shifts in glycemic response and the proportion of *Eubacterium rectale*.** Correlation of the shift of the *Eubacterium rectale* abundance with the shifts observed in postprandial AUC (A), Insulin AUC (B), and maximum glucose levels (C). Shift refers to differences between values obtained during the BR+B period and the baseline. Pearson's  $r$  correlation and the  $P$  values are presented.

Figure S1

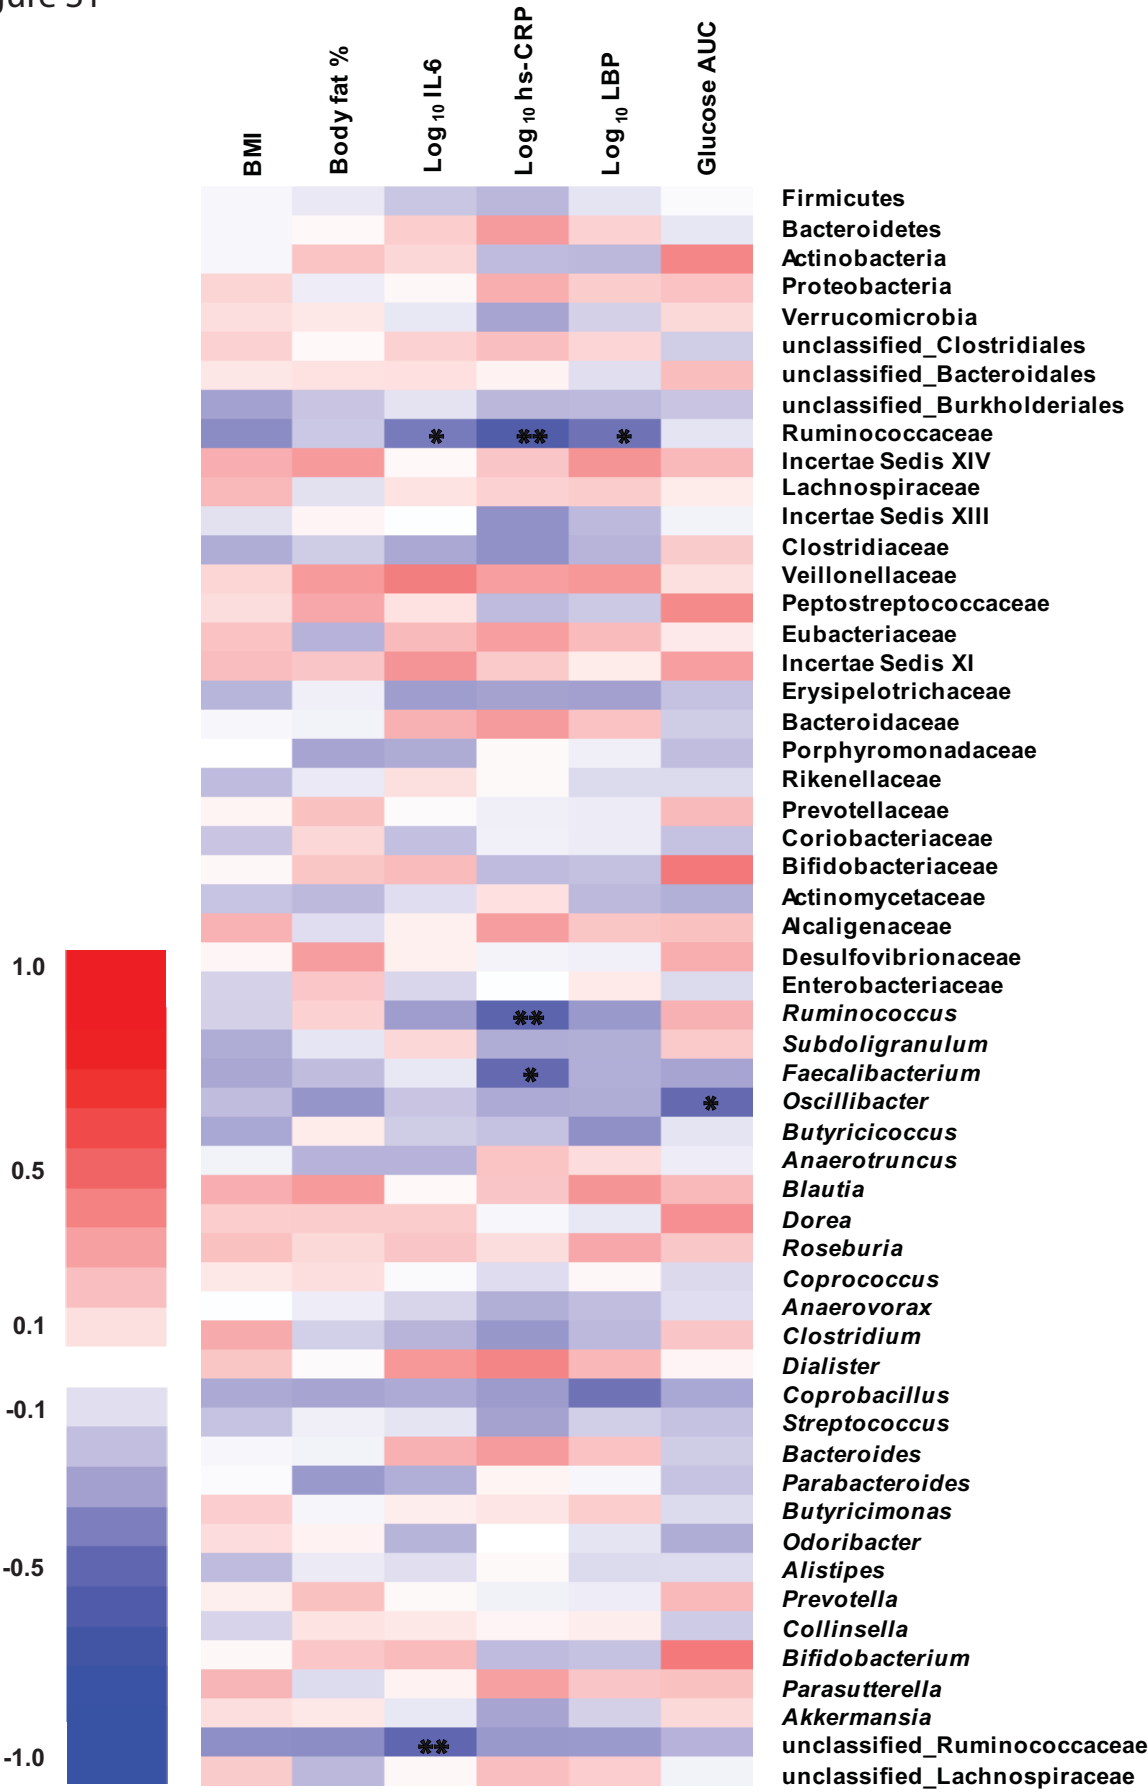



Figure S2

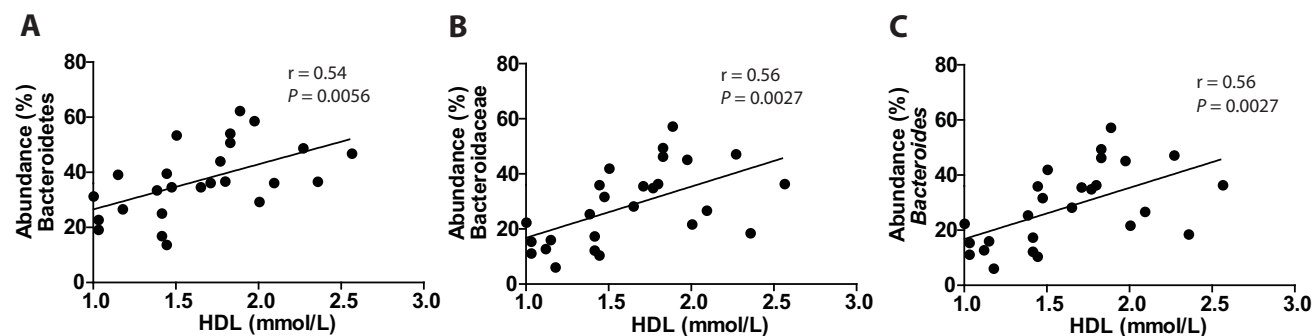

Figure S3

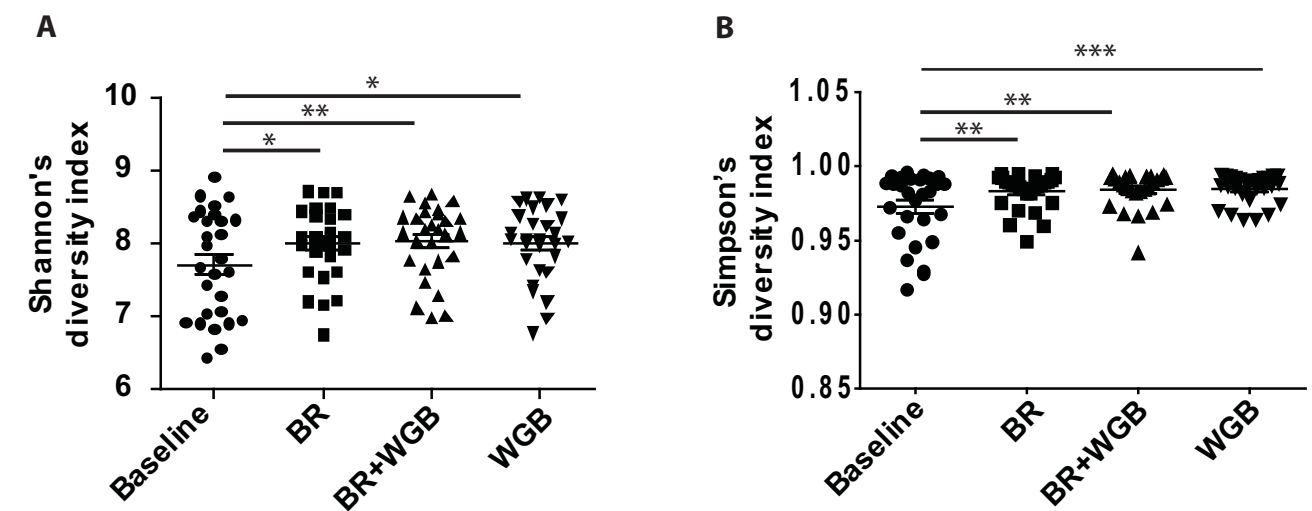

Figure S4

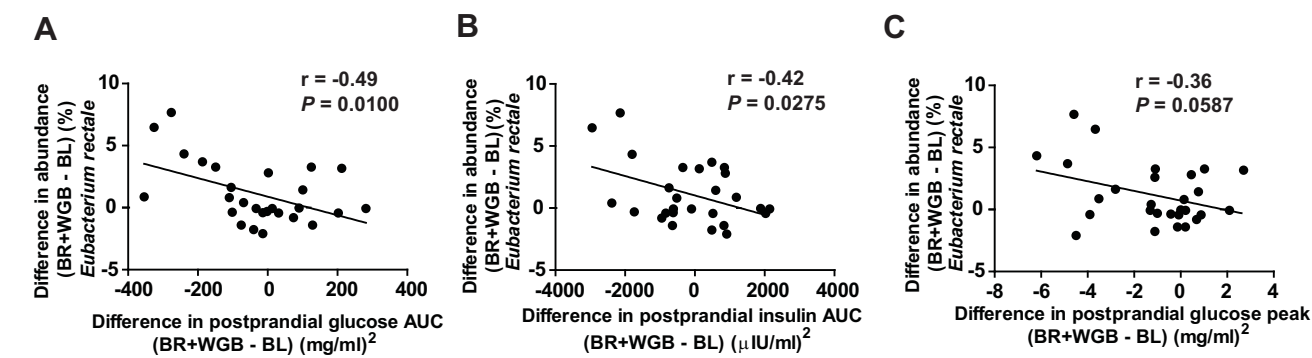

Supplement: ismej2012104x1.pdf [file ismej2012104x1.pdf]
